# Supplementary material for: Conversion of novel bimetallic metal organic frameworks into hierarchically structured electrocatalysts for high performance hydrogen evolution
Source: Royal Society of Chemistry journal article supplement (doi:10.1039/d5se01348h), 2025-12-09
Supplement: d5se01348h1.pdf [file d5se01348h1.pdf]

## Supplementary Information

### Conversion of Novel Bimetallic Metal Organic Frameworks into Hierarchically Structured Electrocatalysts for High Performance Hydrogen Evolution

Dhouha Abid,<sup>a</sup> Soressa Abera Chala,<sup>a</sup> Rongji Liu,<sup>a</sup> Tobias Rios-Studer,<sup>a</sup> Christean Nickel,<sup>a</sup> Sarra Rahali,<sup>a</sup> Kevin Sowa,<sup>a</sup> Galina Matveeva,<sup>a</sup> Dandan Gao,<sup>a</sup> Ute Kolb,<sup>a</sup> and Carsten Streb<sup>\*a</sup>

<sup>a</sup> Department of Chemistry, Johannes Gutenberg University Mainz, Duesbergweg 10-14, Mainz 55128, Germany.

#### Table of Contents

1. Materials and Methods
2. Experimental section
3. Analytical section
4. References

## 1. Materials and Methods

### 1.1. Chemicals

All chemicals were used as received without further purification: cobalt(II) nitrate hexahydrate ( $\text{Co}(\text{NO}_3)_2 \cdot 6\text{H}_2\text{O}$ , 98%, Sigma-Aldrich), Nickel (II) nitrate hexahydrate ( $\text{Ni}(\text{NO}_3)_2 \cdot 6\text{H}_2\text{O}$ , 98.5%, Sigma-Aldrich), 4,4'-bipyridine ( $\text{C}_{10}\text{H}_8\text{N}_2$ , 98%, TCI), and (1R,3S)-(+)-camphoric acid ( $\text{C}_{10}\text{H}_{16}\text{O}_4$ , 99%, Thermo Fisher Scientific).

### 1.2. Instrumentation

**Scanning electron microscopy (SEM):** Scanning electron microscopy was performed on a Hitachi 5200 equipped with an EDX detector.

**Scanning transmission electron microscopy (STEM):** Phase contrast TEM, scanning TEM (STEM), and fast automated diffraction tomography (Fast-ADT) analyses were performed using a Tecnai F30 S-TWIN TEM, equipped with a field emission gun and operated at 300 kV. The setup included a 10 mm condenser aperture, gun lens set to 8, and a spot size of 8. For electron diffraction pattern acquisition, the beam diameter was adjusted to 50 nm. TEM images were recorded using a  $4\text{k} \times 4\text{k}$  Gatan US4000 CCD camera (Gatan, Pleasanton, USA) with a hardware binning of 2.

Fast-ADT diffraction data were acquired using an automated module designed for FEI and JEOL microscopes, enabling high-angular-range tomography (up to  $140^\circ$ ) within approximately 5 minutes for TIMEPIX cameras, with a fixed tilt step of  $1^\circ$ . The crystal position was monitored in microprobe STEM mode, and electron diffraction patterns were obtained under the same conditions. Fast-ADT series were automatically collected over a tilt range of  $-50^\circ$  to  $50^\circ$ , with a  $1^\circ$  step and an exposure time of 0.1 seconds per frame. To integrate reflection intensities across the tilt wedge experimentally, Fast-ADT was combined with precession electron diffraction (PED), generated by a NanoMEGAS DigiStar unit, maintaining a beam precession angle of  $1^\circ$ .

**FT-Infrared spectroscopy (FT-IR):** FT-IR analysis was performed at room temperature using a Bruker Tensor 27 spectrometer, equipped with a diamond attenuated total reflectance (ATR) unit, spanning the frequency range of 400-4000  $\text{cm}^{-1}$ .

**Thermogravimetric analysis (TGA):** Thermogravimetric analysis was performed on 5 mg of powdered sample using a Mettler Toledo system. The measurements were conducted under air atmosphere, with the temperature increasing from 30.00 to 450.00  $^\circ\text{C}$  at a rate of 5.00  $^\circ\text{C}/\text{min}$ .

**Single crystal X-ray diffraction (SC-XRD) measurements:** For the crystal structure determination, X-ray diffraction intensity data for the as-prepared CoNi-MOF was collected on a STOE IPDS 2T diffractometer using  $\text{Mo-K}\alpha$  radiation. Data were collected at 293 K (2) over  $1.9^\circ \leq \theta \leq 32.9^\circ$ . A total of 20923 reflections were recorded

with 4603 showing intensities of  $I > 2\sigma(I)$ . The crystalline structure was solved in the monoclinic crystal system with the  $P2_1$  space group. Cobalt and nickel atom positions were identified using the Patterson method within the WINGX software. [1] Remaining atoms (carbon, oxygen, and nitrogen) were located via successive Fourier calculations and refined with anisotropic thermal parameters using SHELXL-2018. [2] Pore volume was calculated using PLATON SQUEEZE software. Full experimental details for the CoNi-MOFs are summarized in **Table S1**.

**Powder X-ray diffraction (PXRD):** Powder X-ray diffraction was carried out using a Bruker AXS D8 Advance system with Cu K $\alpha$  radiation ( $\lambda = 1.5406 \text{ \AA}$ ) at 40 kV and 40 mA.

**Nitrogen Sorption:** Nitrogen adsorption-desorption isotherms were measured at 77 K using a 3P Micro 300 Surface Area and Pore Size Analyzer to characterize the surface area and pore size of the materials. Prior to analysis, samples were degassed under vacuum. The as-prepared MOF precursors were degassed at 80 °C (353 K) for 20 hours, while the calcined catalysts were degassed at 200 °C (473 K) for the same duration. Nitrogen gas was used as the adsorbate. Pore size distributions were calculated using the Barrett-Joyner-Halenda (BJH) method with a KJS correction.

**X-ray photoelectron spectroscopy (XPS):** X-ray photoelectron spectroscopy was conducted using monochromatized Al K $\alpha$  X-ray radiation with a PHI Quantera SXM system. The binding energies were calibrated with reference to the C 1s peak at 284.8 eV.

**X-ray absorption spectroscopy (XAS):** X-ray absorption spectroscopy (XAS) measurements were performed using a lab-based hiXAS system with EXAFS mode. A quick-scanning extended X-ray absorption fine-structure (QEXAFS) approach was employed in transmission mode, enabling efficient data acquisition with a monochromator oscillation frequency of 1 Hz. The acquisition time was 10 minutes for Ni and Co foil reference standards, and 3 hours for the other samples. Prior to analysis, all samples were pressed into 15 mm diameter pellets. The XAS data were analyzed using Athena and Artemis software. [3]

**Inductively coupled plasma optical emission spectrometry (ICP-OES):** ICP-OES was performed using a Perkin Elmer Plasma 400 spectrometer. Measurements were conducted in an aqueous H<sub>2</sub>SO<sub>4</sub>-HNO<sub>3</sub> solution.

### 1.3. Electrochemical Measurements

**Preparation of the Working Electrode:** The fabrication of the working electrode is a crucial step in assessing the electrochemical properties and practical applicability of the synthesized catalysts. To prepare the catalyst ink, 5 mg of the calcined Co, Ni and CoNi-MOF catalyst was dispersed in a mixture containing 900  $\mu\text{L}$  of isopropanol, 50  $\mu\text{L}$  of deionized water, and 50  $\mu\text{L}$  of Nafion solution (5 wt.% in a lower alcohol mixture). The suspension was sonicated for 1 hour to ensure uniform dispersion. For electrode preparation, 13  $\mu\text{L}$  of the ink was drop-cast onto a glassy carbon electrode (GCE), or

100  $\mu\text{L}$  was applied onto carbon paper (1  $\text{cm}^2$  surface area). The modified electrodes were air-dried, achieving a catalyst loading of 0.3  $\text{mg}\cdot\text{cm}^{-2}$ .

**Electrochemical measurements** were conducted using an Ametek workstation with PMC-1000 configured in a three-electrode setup. The working electrode was a glassy carbon electrode (GCE) with a disk surface area of 0.196  $\text{cm}^2$ . A Hg/HgO electrode served as the reference electrode, while a graphite rod acted as the counter electrode. The electrolyte used in the experiment was a 1 M aqueous solution of KOH. The hydrogen evolution reaction (HER) activity was evaluated via linear sweep voltammetry (LSV) at a scan rate of 5  $\text{mV s}^{-1}$  using a PMC 1000 electrochemical workstation (AMETEK Scientific Instruments). The measured potentials were referenced to the reversible hydrogen electrode (RHE) using the Nernst equation:

$$E_{\text{RHE}} = E_{\text{Hg/HgO}} + E^0_{\text{Hg/HgO}} + 0.0592 \text{ V} \times \text{pH}$$

Polarization curves were recorded without iR compensation, and the Tafel slope was determined using the Tafel equation:

$$\eta = a + b \log(j)$$

Here,  $j$  represents the current density, which was normalized to the geometric surface area of the GCE. For long-term stability assessments, the catalyst was supported on carbon paper ( $\sim 1 \text{ cm}^2$ ).

**Electrochemically Active Surface Area (ECSA):** The ECSA of the catalysts was estimated by evaluating the electrochemical double-layer capacitance ( $C_{\text{dl}}$ ) through cyclic voltammetry (CV) in the potential window of 0.08 V to 0.1 V, where no faradaic processes occur. To ensure signal stability, multiple cyclic scans were performed before data collection.

**Electrochemical Impedance Spectroscopy (EIS):** EIS measurements were conducted at 1.55 V vs. RHE with a 5 mV AC perturbation, sweeping frequencies from 100 kHz to 0.01 Hz. The impedance spectra were analyzed using Z view software by fitting the data to an appropriate equivalent circuit model.

**Faradaic efficiency:** Hydrogen production was quantified using gas chromatography (Shimadzu GC-2030) equipped with a barrier ionization discharge (BID) detector. High-purity helium (He, 99.999%) served as the carrier gas. The faradaic efficiency was determined using the following equation:

$$FE_i = \frac{\alpha_i n_i F}{Q} \times 100\%$$

Where;  $\alpha_i$  represents the number of electrons needed to generate one hydrogen molecule,  $n_i$  denotes the number of moles,  $F$  is the Faraday constant (96,485  $\text{C mol}^{-1}$ ), and  $Q$  corresponds to the total electric charge transferred during the experiment.

#### 1.4. Flow-cell measurements:

**Preparation of the Working Electrode:** For the flow-cell experiments, the catalyst ink was prepared following the same procedure described above. The ink was drop-cast onto carbon paper with a geometric area of 2 cm<sup>2</sup> and dried at room temperature. After solvent evaporation, the catalyst loading at the cathode was adjusted to 0.6 mg cm<sup>-2</sup>.

**Flow-cell measurements:** An anion exchange membrane (AEM) electrolyzer was assembled using a sandwich-type configuration. The coated carbon paper (2 cm<sup>2</sup>, 0.6 mg cm<sup>-2</sup> loading) served as the cathode, while commercial Ni foam was used as the anode. Current collectors were employed on both sides, and an AEM (pre-activated in 1 M KOH) was positioned between the electrodes. The cell was operated using 1 M KOH electrolyte, which was continuously circulated through the flow channels via a peristaltic pump to ensure efficient electrolyte renewal and minimize concentration gradients during operation. Before polarization measurements, the cell was conditioned under open-circuit conditions at 70 °C for 30 min. Polarization curves were subsequently recorded under steady-state conditions, followed by long-term electrolysis at a constant current density of 200 mA cm<sup>-2</sup> to assess the stability of the catalyst.

## 2. Experimental section

### 2.1. Synthesis

#### Synthesis of monometallic Co-MOF Precursor

To synthesize the monometallic Co-MOF, an aqueous solution of Co(NO<sub>3</sub>)<sub>2</sub>·6H<sub>2</sub>O (291 mg, 1 mmol) was gradually added to a mixture of D-camphoric acid (10 mg, 0.5 mmol) and 4,4'-bipyridine (79 mg, 0.5 mmol) in N,N-dimethyl formamide (DMF) under continuous stirring at room temperature. The solution was then neutralized with 0.1 M aqueous KOH, followed by microwave-assisted heating at 70 °C for 35 min under an autogenous pressure of 2 bar. The resulting pink, needle-shaped crystals were thoroughly washed with water, ethanol, and DMF three times, and air-dried at room temperature. The synthesized MOF was activated under vacuum at 80 °C for 4 h to remove the solvent molecules trapped in the pores of the MOF framework. This activation yielded the pure MOF with a 57% in yield. FT-IR spectra (cm<sup>-1</sup>, with their corresponding intensities (s = strong, m = medium, w = weak): 3260 (w), 2961 (m), 2885 (w), 1610 (w), 1542 (s), 1410 (s), 855 (s), 465 (m).

#### Synthesis of monometallic Ni-MOF Precursor

For the monometallic Ni-MOF synthesis, the same protocol was followed, except that a mixture of Ni(NO<sub>3</sub>)<sub>2</sub>·6H<sub>2</sub>O (7.3 mg, 0.5 mmol) was used. The reaction yielded the purified MOF in 50% yield. FT-IR spectra (cm<sup>-1</sup>, with their corresponding intensities (s = strong, m = medium, w = weak): 3120 (w), 2962 (m), 2820 (w), 1627 (w), 1530 (s), 1462 (s), 870 (s), 463 (m).

#### Synthesis of CoNi-dual-doped MOF Precursor

For the dual-doped CoNi-MOF synthesis, the same protocol was followed, except that a mixture of  $\text{Co}(\text{NO})_2 \cdot 6\text{H}_2\text{O}$  (7 mg, 0.5 mmol) and  $\text{Ni}(\text{NO})_2 \cdot 6\text{H}_2\text{O}$  (7.3 mg, 0.5 mmol) was used. The reaction yielded the purified MOF in 46% yield. FT-IR spectra ( $\text{cm}^{-1}$ , with their corresponding intensities (s = strong, m = medium, w = weak): 3110 (w), 2952 (m), 2880 (w), 1607 (w), 1540 (s), 1402 (s), 850 (s), 461 (m).

### Synthesis of monometallic Co-MOF catalyst

The obtained Co-MOF crystals were placed in a quartz crucible and calcined in a tube furnace at temperatures ranging from 550 to 850 °C under a continuous flow of argon for 3 h, with a controlled heating rate of 5 °C/min. After pyrolysis, the resulting oxide sample was thoroughly washed with deionized water and ethanol to remove residual impurities. The final black products were designated based on the calcination temperature: Co-MOF@550 °C, Co-MOF@650 °C, Co-MOF@750 °C, and Co-MOF@850 °C.

### Synthesis of Ni-dual-doped catalyst

The Ni-MOF crystals were calcined at 850°C under the same conditions, and labeled as Ni-MOF@850 °C

### Synthesis of CoNi-dual-doped catalyst

The CoNi-MOF crystals were calcined at 850°C under the same conditions, and labeled as CoNi-MOF@850 °C.

## 3. Analytical section

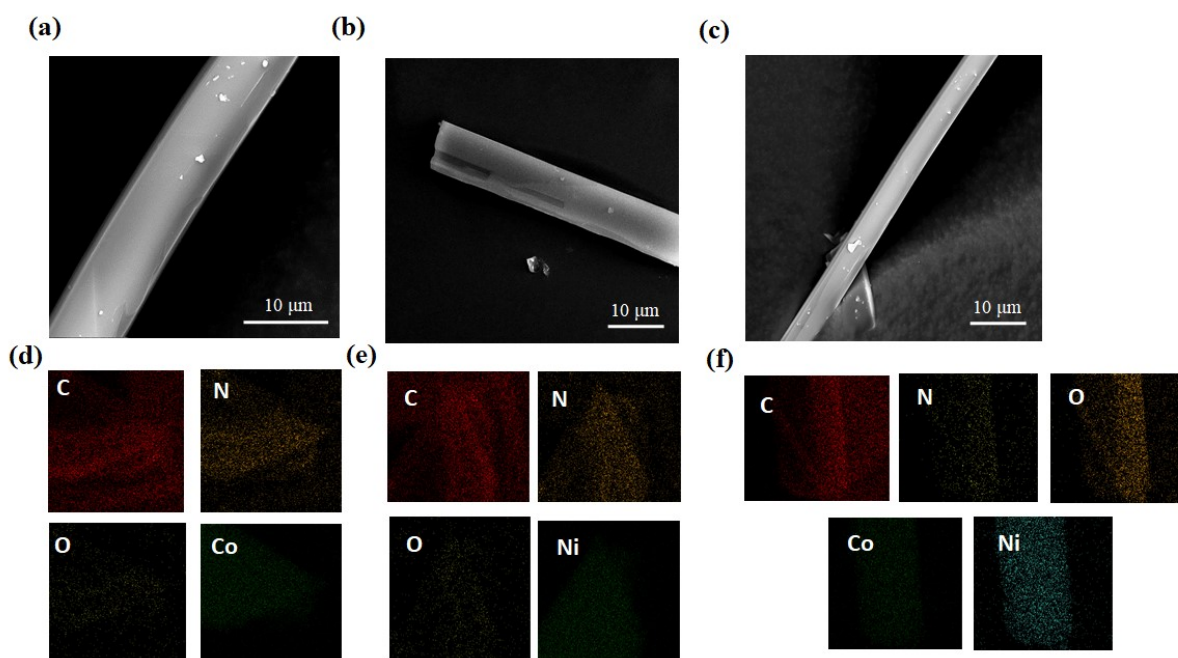

**Fig. S1** SEM images of (a) Co-MOF, (b) Ni-MOF, (c) CoNi-MOF, and (d-f) Corresponding elemental component mappings of Co-MOF, Ni-MOF and CoNi-MOF, respectively.



The morphologies of the as-synthesized Co-MOF, Ni-MOF and CoNi-MOF were investigated using scanning electron microscopy (SEM). SEM images of all MOF precursors reveal a distinct needle-like morphology, characteristic of porous structures. In addition, energy-dispersive X-ray spectroscopy (EDX) confirmed the uniform distribution of Co, C, O, and N in the Co-MOF, and Ni, C, O, and N in the Ni-MOF samples and CoNi-MOF showed a homogeneous distribution of Co, Ni, C, O, and N, verifying the successful incorporation of nickel into the framework.

**Table. S1** Experimental details for the as-prepared CoNi-MOF.

|                                                                            | CoNi-MOF                         |
|----------------------------------------------------------------------------|----------------------------------|
| Chemical formula                                                           | $C_{30}H_{36}(Co/Ni)_2N_2O_{12}$ |
| $M_r$ (g/mol)                                                              | 742.53                           |
| Crystal system, space group                                                | Monoclinic, $P2_1$               |
| Temperature (K)                                                            | 293 (2)                          |
| a, b, c (Å)                                                                | 6.7(6), 13.4(6), 18.5(19)        |
| $\beta$ (°)                                                                | 97.5 (8)                         |
| V (Å <sup>3</sup> )                                                        | 1665.9(3)                        |
| Z                                                                          | 2                                |
| Radiation type                                                             | Mo K $\alpha$                    |
| D                                                                          | 1.4                              |
| Crystal size (mm)                                                          | 0.24 × 0.09 × 0.08               |
| No. of measured, independent and observed [ $I > 2\sigma(I)$ ] reflections | 20923, 9908, 142                 |
| $R_{int}$                                                                  | 0.053                            |
| $R[F^2 > 2\sigma(F^2)]$ , $wR(F^2)$ , S                                    | 0.086, 0.255, 1.0                |
| No. of reflections                                                         | 6116                             |
| Flack parameter                                                            | -0.016 (1)                       |

**Fig. S2** The experimental and simulated PXRD patterns of Co, Ni-MOF, and CoNi-MOF.

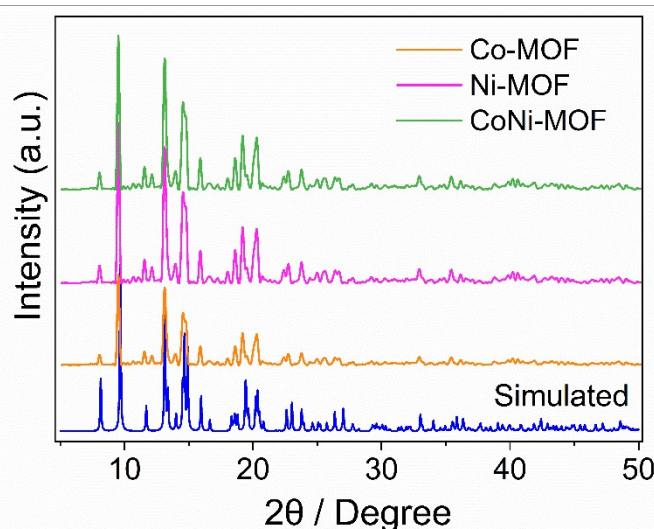

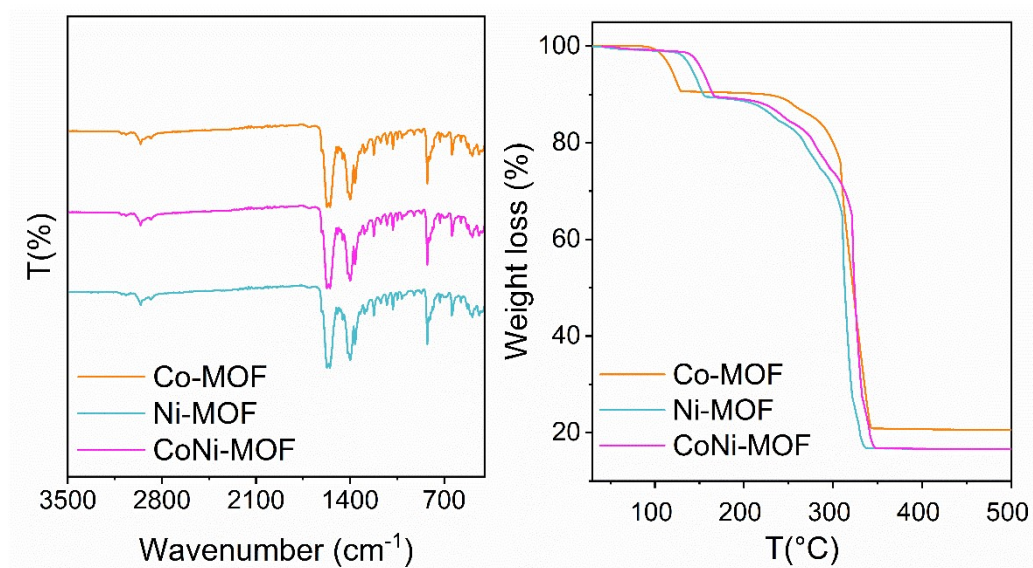

**Fig. S3** (a) FT-IR Spectra of the monometallic Co, Ni-MOF, and bimetallic CoNi-MO, (b) TGA profiles of Co, Ni-MOF, and CoNi-MOF.

The FT-IR spectra of MOF precursors, recorded at room temperature, confirm the removal of guest solvent molecules from the pores after activation (**Figure S2a, SI**). Notable changes in the infrared spectra include a broad band at 3260, 3220 and 3110 cm<sup>-1</sup> (OH-stretching band), 1610, 168 and 1607 cm<sup>-1</sup> (H-O-H bending mode), and 850, 851, and 855 cm<sup>-1</sup>, respectively for Co-MOF, Ni-MOF, and CoNi-MOF. After the activation process, both MOFs exhibit similar IR spectra, with characteristic peaks of the organic ligands.

The TGA profiles for porous Co, Ni, and CoNi-MOF (**Figure S2b, SI**) reveal a two-step decomposition process. The initial weight loss, occurring between 80.25 and 129.17 °C for Co-MOF, 81.25 and 140.23 for Ni-MOF and 86.91 and 156.16 °C for CoNi-MOF, corresponds to a 9.49, 9.20 and 9.48 wt%, respectively, attributed to the release of coordinated water molecules. The second stage shows significant weight loss between 184.16 and 341.66 °C for Co-MOF (69.73 wt%), 185.32 and 333.60 °C (68.70 wt%) for Ni-MOF and 190.51 and 335.41 °C for CoNi-MOF (73.57 wt%), associated with the decomposition of the structural framework. This leads to the formation of cobalt oxide (CoO) in the Co-MOF sample, and both nickel oxide (NiO) and cobalt oxide (CoO) as residues in the CoNi-MOF sample.



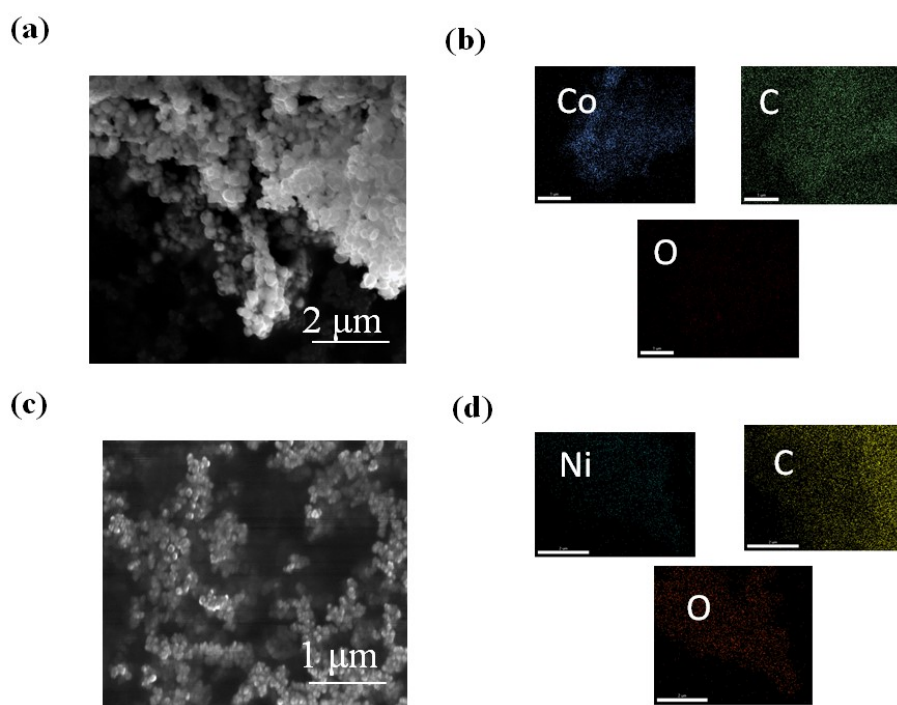

**Fig. S4** (a) SEM images of Co-MOF@850°C, (b) the corresponding pore size distributions of Co-MOF@850°C, (c) SEM images of Co-MOF@850°C, and (d) the corresponding pore size distributions of Co-MOF@850°C.

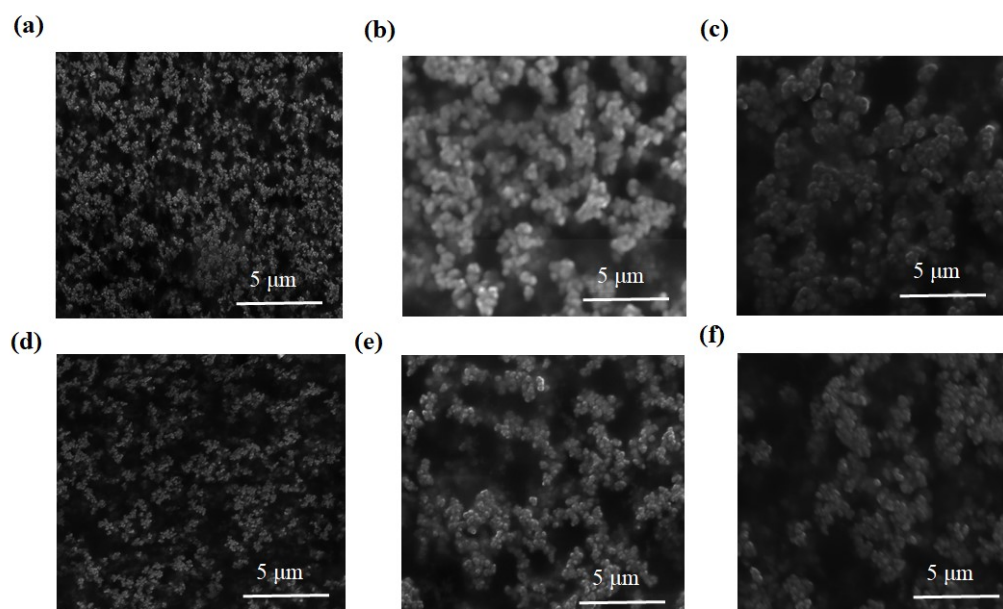

**Fig. S5** SEM images of (a–c) Co-MOF calcined at 550, 650, and 750 °C, and (d–f) Ni-MOF calcined at 550, 650, and 750 °C.

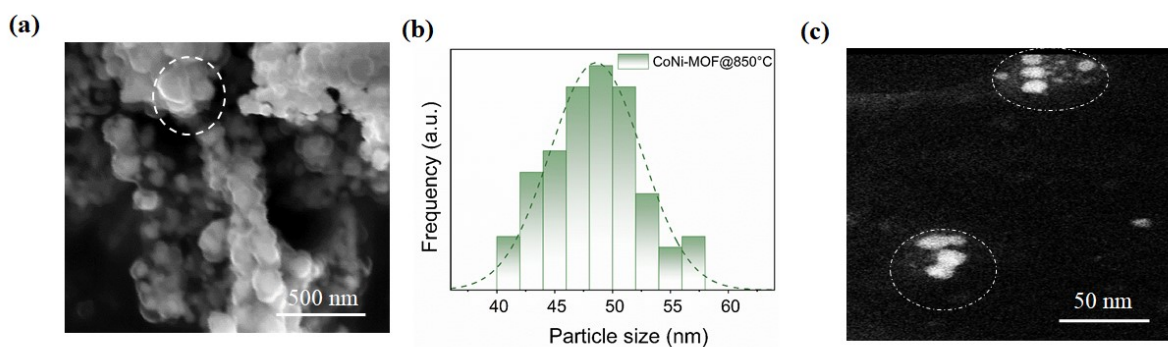

**Fig. S6** (a) SEM image for CoNi-MOF@850°C, (b) particle size distribution histogram, and (c) HAADF-STEM image for CoNi-MOF@850°C.

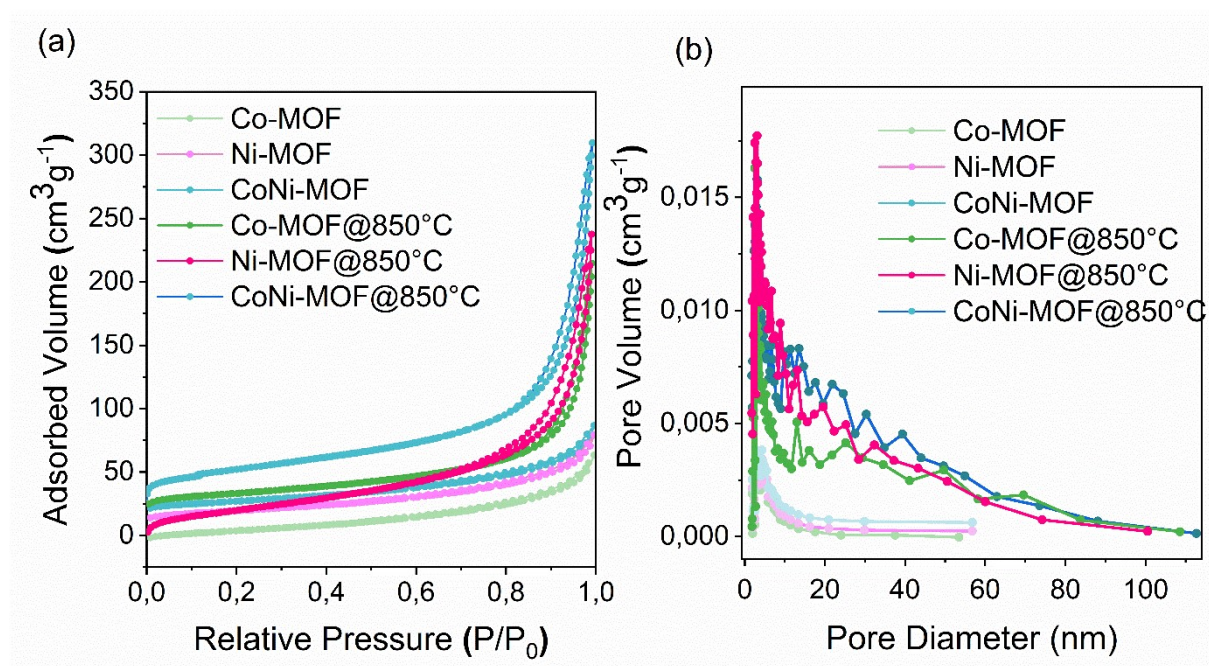

**Fig. S7** (a) Nitrogen adsorption-desorption isotherms of Co, Ni, CoNi-MOF, and Co, Ni, CoNi calcined at 850°C, (b) the corresponding pore size distributions of all samples.

**Table. S2** Specific surface area, pore volume and pore size distribution of Co-MOF, CoNi-MOF, and their calcined forms at 850°C.

| Material       | Surface area ( $S_{\text{BET}}$ )<br>$\text{m}^2/\text{g}$ | Pore volume ( $V_{\text{Tot}}$ )<br>$\text{cm}^3/\text{g}$ | Pore size (BJH)<br>Nm |
|----------------|------------------------------------------------------------|------------------------------------------------------------|-----------------------|
| Co-MOF         | 36.6                                                       | 0.09                                                       | 10.5                  |
| Ni-MOF         | 41.4                                                       | 0.1                                                        | 11.3                  |
| CoNi-MOF       | 45.7                                                       | 0.1                                                        | 11.2                  |
| Co-MOF@850°C   | 124.8                                                      | 0.4                                                        | 14.0                  |
| Ni-MOF@850°C   | 141.3                                                      | 0.7                                                        | 22.8                  |
| CoNi-MOF@850°C | 183.2                                                      | 0.5                                                        | 23.7                  |

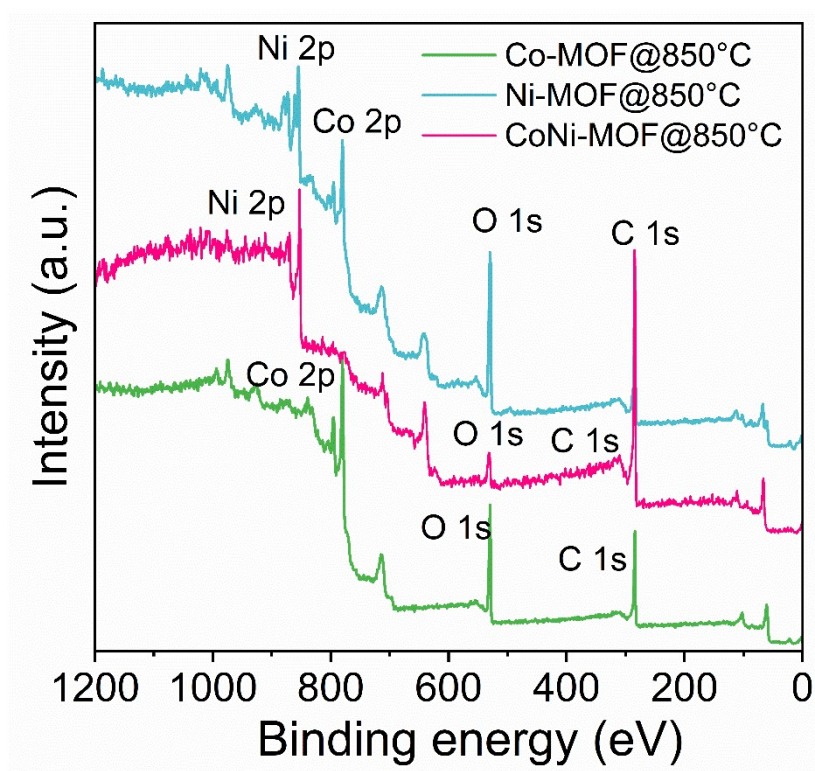

**Fig. S8** XPS survey of Co-MOF@850°C, Ni-MOF@850°C, and CoNi-MOF@850°C catalysts.

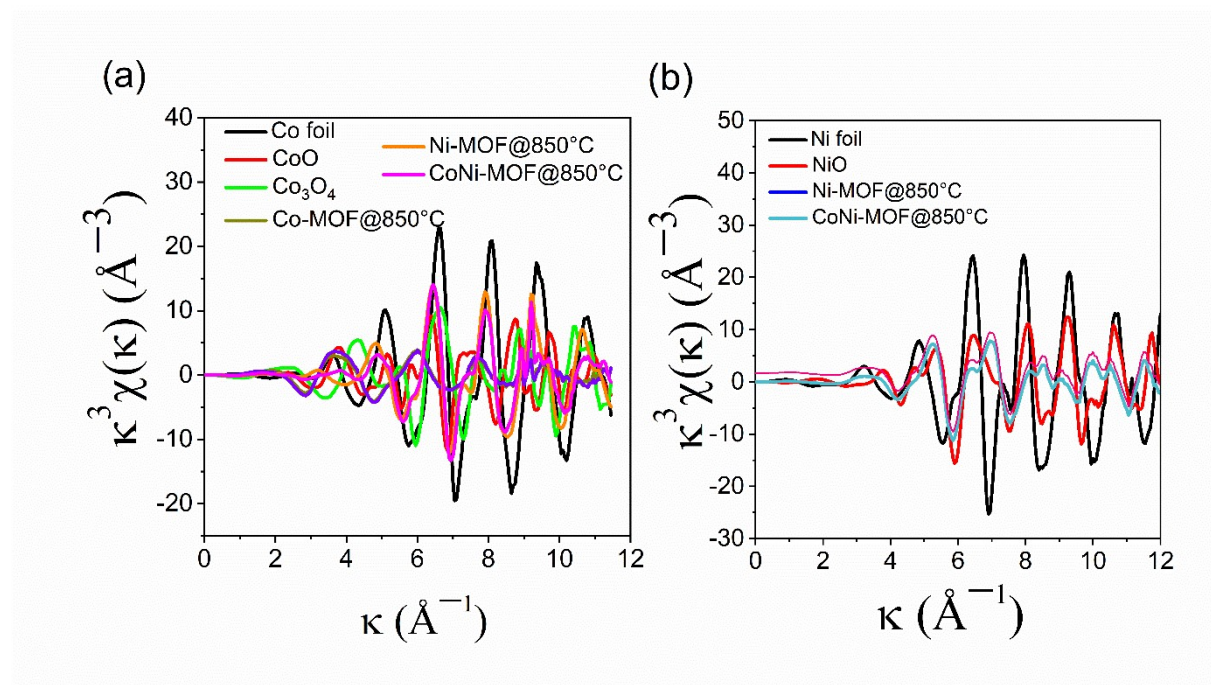

**Fig. S9** (a) Co K-edges, and (b) Ni K-edges of Co, Ni and CoNi-MOFs, and Co, Ni and CoNi-MOF@850°C catalysts along with standard Co and Ni reference materials.



**Table. S3** Metal element contents of the monometallic Co and Ni-MOFs and the bimetallic CoNi-MOF and their calcined catalysts at 850°C determined by ICP-OES.

| Samples        | ICP- OES   |            |
|----------------|------------|------------|
|                | Co (wt. %) | Ni (wt. %) |
| Co-MOF         | 16.88      | -          |
| Ni-MOF         | -          | 16.03      |
| CoNi-MOF       | 9.45       | 7.46       |
| Co-MOF@850°C   | 6.14       | -          |
| Ni-MOF@850°C   | -          | 6.01       |
| CoNi-MOF@850°C | 3.73       | 2.52       |

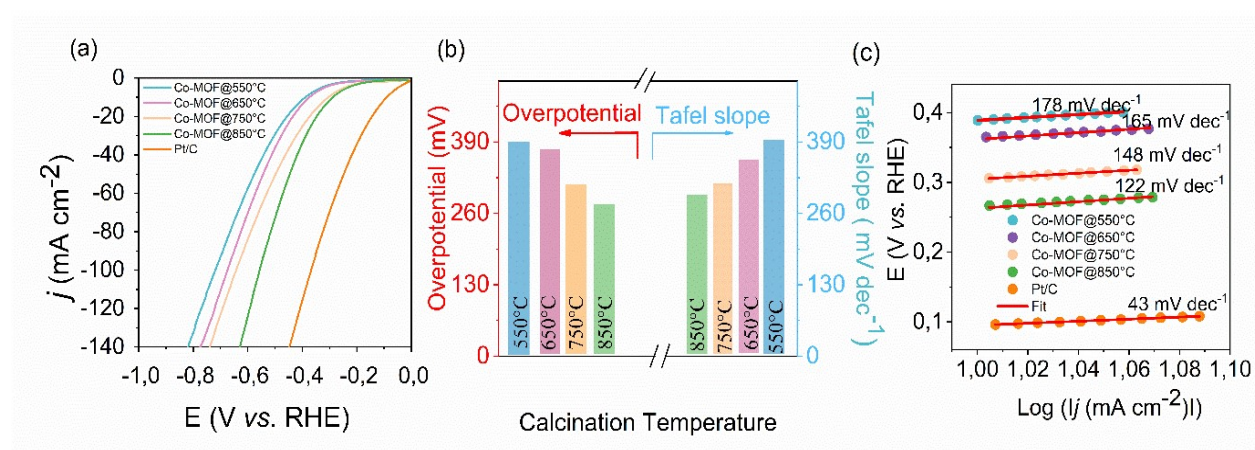

**Fig. S10** Electrocatalytic HER performance of Co-MOF catalysts calcined at different temperatures in 1 M KOH without iR correction: (a) LSV curves, (b) histogram of Tafel slopes and overpotentials at  $j = 10 \text{ mA cm}^{-2}$ , and (c) the corresponding Tafel slope plots.

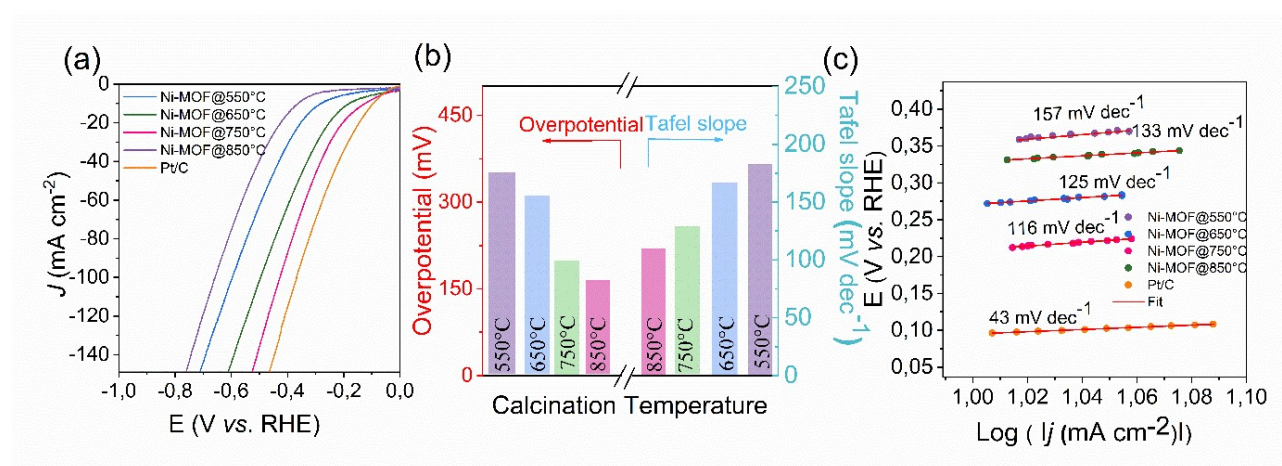

**Fig. S11** Electrocatalytic HER performance of Ni-MOF catalysts calcined at different temperatures in 1 M KOH without iR correction: (a) LSV curves, (b) histogram of Tafel slopes and overpotentials at  $j = 10 \text{ mA cm}^{-2}$ , and (c) the corresponding Tafel slope plots.

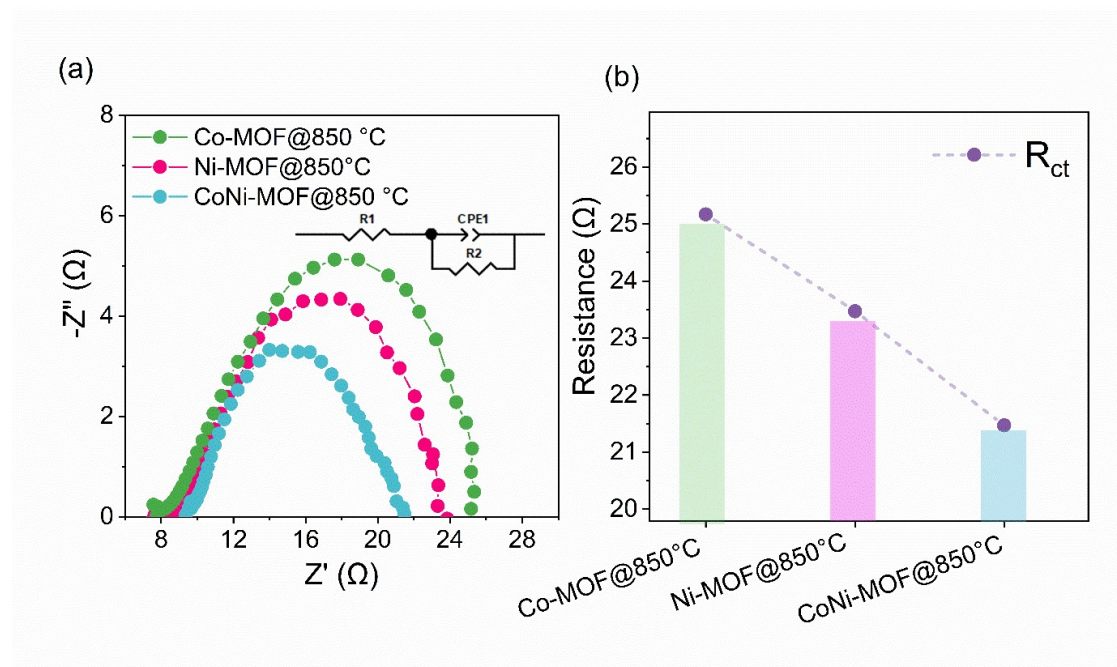

**Fig. S12** (a) Nyquist plots for Co-MOF@850°C, Ni-MOF@850°C, and CoNi-MOF@850°C catalysts, and (b)  $R_{ct}$  values for Co, Ni and CoNi catalysts.

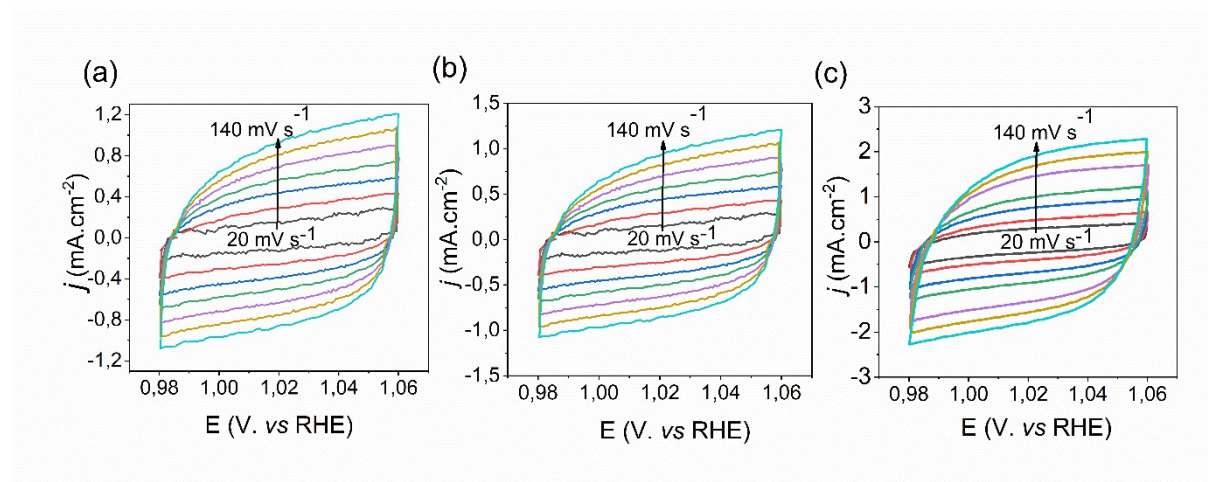

**Fig. S13** Cyclic voltammetry (CV) plot measured at different scan rates (20–140  $\text{mV s}^{-1}$ ) for (a) Co-MOF@850°C, (b) Ni-MOF@850°C and (c) CoNi-MOF@850°C catalysts.

The double-layer capacitance ( $C_{dl}$ ) was evaluated using cyclic voltammetry (CV) at different scan rates (20–140  $\text{mV s}^{-1}$ ) within a potential window of 0.98–1.06 V vs. RHE. As the scan rate increased, the current density increased for Co, Ni and CoNi catalysts,

with CoNi-MOF@850°C exhibiting the highest current density. To determine the  $C_{dl}$  value, the average capacitive current density ( $\Delta j$ ) was calculated using  $\Delta j = |j_c - j_a|/2$ , where  $j_c$  and  $j_a$  represent the cathodic and anodic current densities, respectively. At a potential of 1.02 V,  $\Delta j$  was plotted against the scan rates, and the slope of the resulting linear fit provided the  $C_{dl}$ . Besides, the electrochemically active surface area (ECSA) of CoNi-MOF@850°C, calculated using  $ECSA = C_{dl}/C_s$  (with  $C_s$  ased to be 0.02 mF/cm<sup>2</sup> in 1 M aqueous KOH), was determined to be 700.1 cm<sup>2</sup>, significantly higher than that of Co-MOF@850°C (306.5 cm<sup>2</sup>) and Ni-MOF@850°C (364.5 cm<sup>2</sup>). This indicates that the Ni substitution generate more accessible active sites, thereby enhancing the overall catalytic performance.

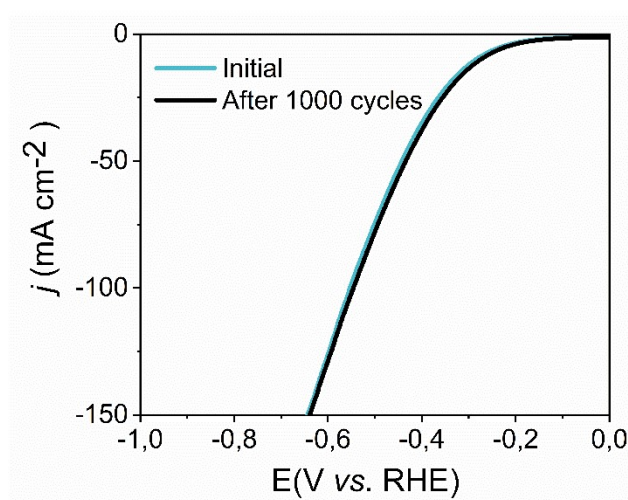

**Fig. S14** LSV curves of CoNi-MOF@850 °C catalyst recorded before and after 1000 CV cycles.



**Table. S4** Comparison of HER activity of Co-MOF@850 °C, Ni-MOF@850 °C, and CoNi-MOF@850 °C with other reported Co- and Co–Ni-based catalysts.

| Electrocatalyst                           | Overpotential (mV) | Tafel slope (mV dec <sup>-1</sup> ) | References |
|-------------------------------------------|--------------------|-------------------------------------|------------|
| CoNi/NBC                                  | 117                | 146                                 | [4]        |
| Ni <sub>1</sub> Co <sub>10</sub> /C-oxide | 343                | 127                                 | [5]        |
| CoNiO@CNC                                 | 149                | 80                                  | [6]        |
| Co-MOF-800                                | 92                 | 127                                 | [7]        |
| CoNi-NCS                                  | 260                | 122                                 | [8]        |
| CoNiP/CoNi                                | 174                | 125                                 | [9]        |
| XoNiP/CoNi-RGO                            | 150                | 97                                  | [10]       |
| Ni <sub>2.5</sub> -Co <sub>2.5</sub> -Pn  | 148                | 118                                 | [11]       |
| Co <sub>x</sub> -Ni <sub>y</sub> -P       | 130                | 93                                  | [12]       |
| CoNi/CoNiO <sub>2</sub> @NC-600           | 237                | 125                                 | [13]       |
| CoNiP-NWs                                 | 252                | 128                                 | [14]       |
| CoNiP <sub>4</sub> O <sub>12</sub>        | 234                | 71.4                                | [15]       |
| H <sub>1</sub> -NiCoP                     | 230                | 145                                 | [16]       |
| CoS@CoNi-LDH/CC                           | 124                | 89                                  | [17]       |
| Ni-Co-S                                   | 129                | 96.1                                | [18]       |
| Ni doped Co <sub>3</sub> S <sub>4</sub>   | 270                | 97                                  | [19]       |
| CoNi-MOF@NF                               | 147                | 109.6                               | [20]       |
| Co-MOF@850°C                              | 239                | 122                                 | This work  |
| Ni-MOF@850°C                              | 172                | 116                                 | This work  |
| CoNi-MOF@850°C                            | 148                | 65                                  | This work  |

## 4. References

1. L. J. Farrugia, *Journal of Applied Crystallography*, 1999, 32, 837–838.
2. G. M. Sheldrick, *Acta Crystallographica Section C: Structural Chemistry*, 2018, 74, 2053–2296.
3. B. Ravel, M. Newville, *Journal of Synchrotron Radiation*, 2005, 12, 537–541.
4. M. R. Liu, Q. L. Hong, Q. H. Li, Y. Du, H. X. Zhang, S. Chen, T. Zhou, J. Zhang, *Advanced Functional Materials*, 2018, 28, 1805520.
5. X. Yang, Z. Li, Z. Yang, D. Meng, Z. Wang, *Catalysis Science & Technology*, 2024, 14, 6814–6823.
6. Z. Li, J. Wang, J. Zhang, C. Huang, J. J. Zhou, L. Xu, L. Wang, S. Lu, L. Chen, *Applied Surface Science*, 2024, 674, 159076.
7. A. Gupta, C. A. Allison, M. E. Ellis, J. Choi, A. Davis, R. Srivastava, F. M. de Souza, D. Neupane, S. R. Mishra, F. Perez, A. Kumar, T. Dawsey, *International Journal of Hydrogen Energy*, 2022, 47, 37684–37696.
8. Y. Lu, Y. Deng, S. Lu, Y. Liu, J. Lang, X. Cao, H. Gu, *Nanoscale*, 2019, 11, 21259–21265.
9. P. Arunkumar, S. Gayathri, J. H. Han, *ChemSusChem*, 2021, 14, 1921–1935.
10. Z. Cai, A. Wu, H. Yan, Y. Xiao, C. Chen, C. Tian, L. Wang, R. Wang, H. Fu, *Nanoscale*, 2018, 10, 7619–7629.
11. Y. Du, M. Zhang, Z. Wang, Y. Liu, Y. Liu, Y. Geng, L. Wang, *Journal of Materials Chemistry A*, 2019, 7, 8602–8608.
12. Q. Zhou, D. Wang, *New Journal of Chemistry*, 2022, 46, 7490–7496.
13. Q. Zhang, X. L. Li, B. X. Tao, X. H. Wang, Y. H. Deng, X. Y. Gu, L. J. Li, W. Xiao, N. B. Li, H. Q. Luo, *Applied Catalysis B: Environmental*, 2019, 254, 634–646.
14. I. Amorim, J. Xu, N. Zhang, D. Xiong, S. M. Thalluri, R. Thomas, J. P. S. Sousa, A. Araújo, H. Li, L. Liu, *Catalysis Today*, 2020, 358, 196–202.
15. B. Guo, J. Zhao, Y. Xu, X. Wen, X. Ren, X. Huang, S. Niu, Y. Dai, R. Gao, P. Xu, S. Li, *ACS Applied Materials & Interfaces*, 2024, 16, 8939–8948.
16. J. Zhang, L. Zhang, X. Wang, W. Zhu, Z. Zhuang, *Chemical Communications*, 2019, 56, 90–93.
17. K. Ao, Q. Wei, W. A. Daoud, *ACS Applied Materials & Interfaces*, 2020, 12, 33595–33602.
18. C. Wu, Y. Du, Y. Fu, W. Wang, T. Zhan, Y. Liu, Y. Yang, L. Wang, *Composites Part B: Engineering*, 2019, 177, 107252.
19. J. Wang, Y. Wang, Z. Yao, Z. Jiang, *Chinese Journal of Chemical Engineering*, 2022, 42, 380–388.
20. J. Chen, H. Zhang, Z. Shi, Q. Lu, Y. Feng, T. Zhang, *Ionics*, 2025, 31, 9419–9430.
